# Supplementary material
Source: PubMed Central journal article supplement (PMC428473)

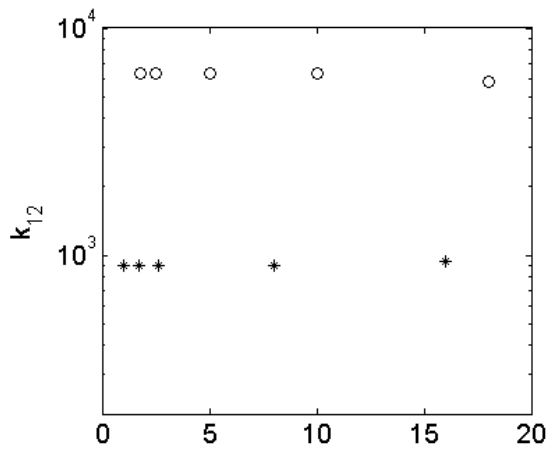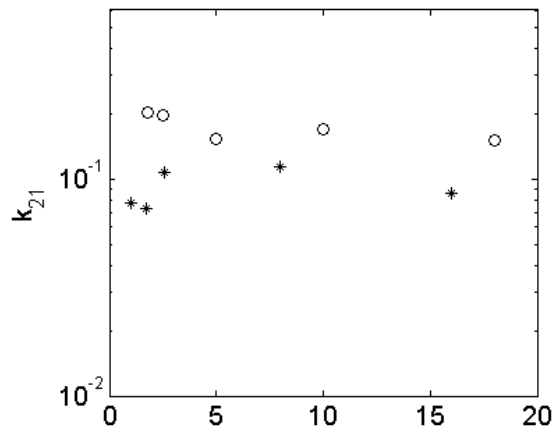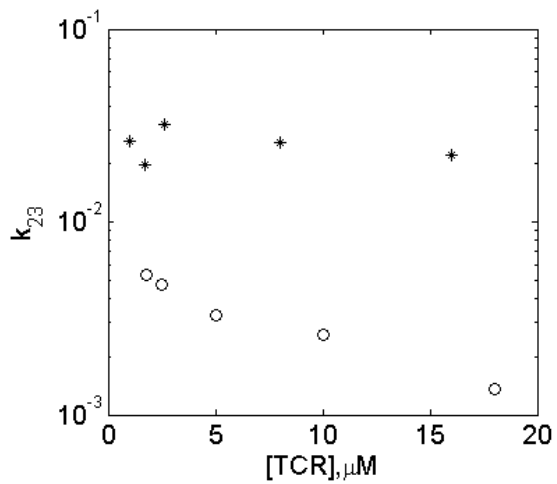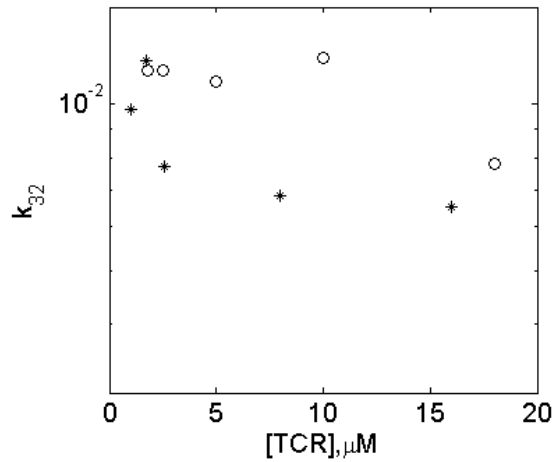

Supplement: pnas_101_24_9063__2.pdf [file pnas_101_24_9063__2.pdf]

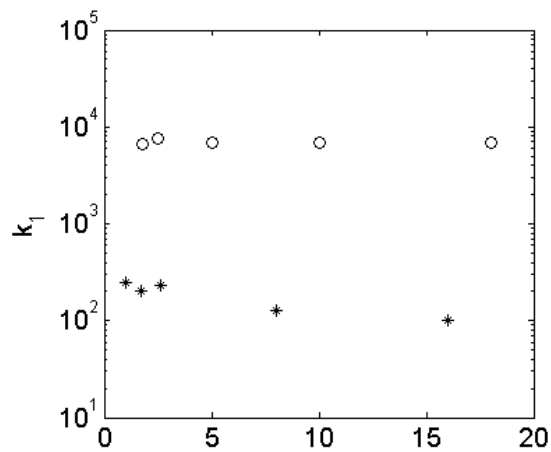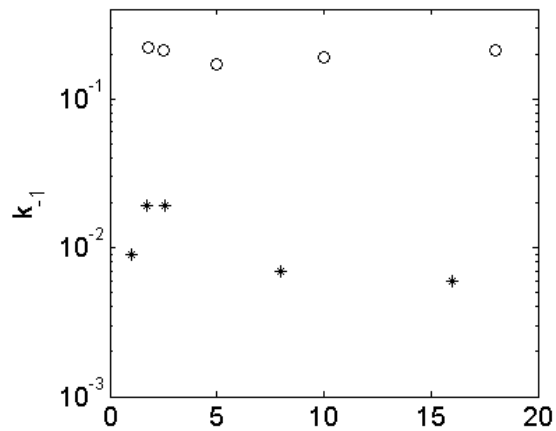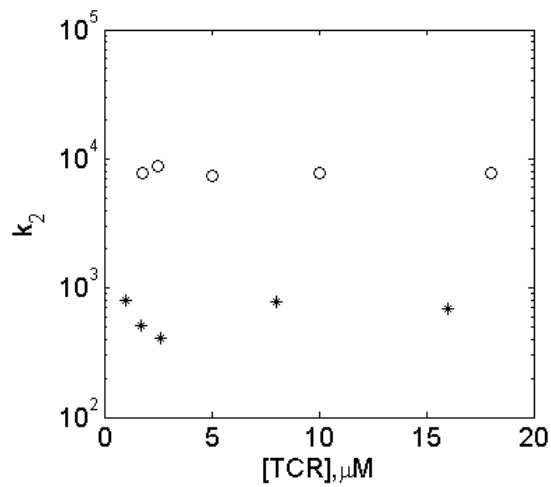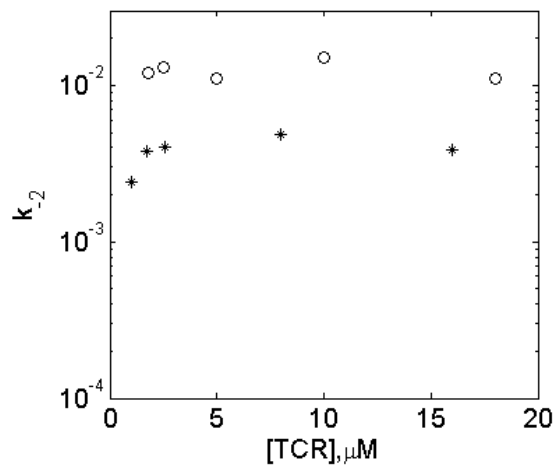

Supplement: pnas_101_24_9063__3.pdf [file pnas_101_24_9063__3.pdf]
